# Supplementary material for: Homemade Kefir Consumption Improves Skin Condition—A Study Conducted in Healthy and Atopic Volunteers
Source: MDPI journal article supplement (doi:10.3390/foods10112794), 2021-11-13
Supplement: s1 [file s1]

## Supplementary Material

**Supplemental Table S1** – Socio-demographic characteristics of study groups (relative frequency (%)).

| Sociodemographic characteristics | Healthy group<br>(n = 33) |           |                  | Atopic group<br>(n = 19) |          |                  |
|----------------------------------|---------------------------|-----------|------------------|--------------------------|----------|------------------|
|                                  | HK                        | H0        | <i>p</i> - value | AK                       | A0       | <i>p</i> - value |
| Scholarity                       |                           |           |                  |                          |          |                  |
| High School (12th grade), n (%)  | 0                         | 0         | 0.225            | 4 (44.5)                 | 0        | 0.167            |
| Graduate, n (%)                  | 12 (92.3)                 | 15 (75.0) |                  | 3 (33.3)                 | 5 (50.0) |                  |
| Master, n (%)                    | 0                         | 4 (20.0)  |                  | 1 (11.1)                 | 1 (10.0) |                  |
| Doctorate, n (%)                 | 1 (7.7)                   | 1 (5.0)   |                  | 1 (11.1)                 | 3 (30.0) |                  |
| Professional School, n (%)       | 0                         | 0         |                  | 0                        | 1 (10.0) |                  |
| Career                           |                           |           |                  |                          |          |                  |
| Employed, n (%)                  | 1 (7.7)                   | 2 (10.0)  | 0.822            | 4 (44.4)                 | 5 (50.0) | 0.809            |
| University student, n (%)        | 12 (92.3)                 | 18 (90.0) |                  | 5 (55.6)                 | 5 (50.0) |                  |
| Residence area                   |                           |           |                  |                          |          |                  |
| Urban, n (%)                     | 8 (61.5)                  | 18 (90.0) | 0.051            | 6 (66.7)                 | 9 (90.0) | 0.213            |
| Rural, n (%)                     | 5 (38.5)                  | 2 (10.0)  |                  | 3 (33.3)                 | 1 (10.0) |                  |
| Smoking habits                   |                           |           |                  |                          |          |                  |
| Smoker, n (%)                    | 4 (30.8)                  | 2 (10.0)  | 0.121            | 1 (11.1)                 | 1 (10.0) | 0.622            |
| Occasional smoker, n (%)         | 1 (7.7)                   | 0         |                  | 0                        | 1 (10.0) |                  |
| Non smoker, n (%)                | 8 (61.5)                  | 18 (90.0) |                  | 8 (88.9)                 | 8 (80.0) |                  |
| Dairy consumption or substitutes |                           |           |                  |                          |          |                  |
| Cow milk, n (%)                  | 6 (46.2)                  | 8 (40.0)  | 0.727            | 5 (55.6)                 | 3 (30.0) | 0.260            |
| Natural yogurt, n (%)            | 11 (84.6)                 | 17 (85.0) | 0.976            | 6 (66.7)                 | 8 (80.0) | 0.510            |
| Vegetable drink, n (%)           | 7 (53.8)                  | 7 (35.0)  | 0.284            | 4 (44.4)                 | 6 (60.0) | 0.498            |
| Alcohol consumption              |                           |           |                  |                          |          |                  |
| Never, n (%)                     | 5 (38.5)                  | 9 (45.0)  | 0.445            | 5 (66.7)                 | 2 (20.0) | 0.276            |
| 1 to 2 times/week, n (%)         | 7 (53.8)                  | 11 (55.0) |                  | 3 (22.2)                 | 6 (60.0) |                  |
| 3 to 6 times/week, n (%)         | 1 (7.7)                   | 0         |                  | 1 (11.1)                 | 2 (20.0) |                  |

Groups were compared by Chi-Square test, with  $p < 0.05$  for statistical significance.

**Supplemental Table S2** – Daily dietary intake characteristics of study groups (mean  $\pm$  SD).

| Daily dietary intake<br>characteristics | Healthy group<br>(n = 33) |                  |                  | Atopic group<br>(n = 19) |                  |                  |
|-----------------------------------------|---------------------------|------------------|------------------|--------------------------|------------------|------------------|
|                                         | HK                        | H0               | <i>p</i> - value | AK                       | A0               | <i>p</i> - value |
| Energy, kcal                            | 1624 $\pm$ 469.1          | 1634 $\pm$ 592.5 | 0.941            | 1684 $\pm$ 315.8         | 1670 $\pm$ 344.0 | 0.870            |
| Carbohydrates, %                        | 43.7 $\pm$ 6.78           | 47.2 $\pm$ 5.97  | 0.224            | 50.4 $\pm$ 6.69          | 47.2 $\pm$ 5.07  | 0.191            |
| Protein, %                              | 23.7 $\pm$ 5.52           | 21.1 $\pm$ 4.87  | 0.197            | 22.5 $\pm$ 3.74          | 22.9 $\pm$ 3.98  | 0.806            |
| Fat, %                                  | 32.3 $\pm$ 6.57           | 31.5 $\pm$ 5.24  | 0.912            | 27.1 $\pm$ 4.47          | 29.9 $\pm$ 4.45  | 0.165            |
| Fiber, g                                | 16.9 $\pm$ 4.78           | 16.4 $\pm$ 5.69  | 0.631            | 21.9 $\pm$ 4.80          | 18.8 $\pm$ 5.68  | 0.288            |

|              |              |              |       |              |              |       |
|--------------|--------------|--------------|-------|--------------|--------------|-------|
| Water, L/day | 2.18 ± 0.423 | 2.41 ± 0.459 | 0.071 | 2.39 ± 0.429 | 2.20 ± 0.286 | 0.347 |
|--------------|--------------|--------------|-------|--------------|--------------|-------|

SD – Standard deviation. HK – Healthy skin with kefir intake; H0 - Healthy skin without kefir intake; AK – Atopic skin with kefir intake; A0 – Atopic skin without kefir intake. Groups were compared using Mann-Whitney U-test, with  $p < 0.05$  for statistical significance.

**Supplemental Table S3** – Individual variation in skin parameters, between t0 and t8 (Wilcoxon standardized (Z) test statistic ( $p$ -value)).

| Skin parameters            | Healthy group<br>(n=33) |                 | Atopic group<br>(n = 19) |                 |
|----------------------------|-------------------------|-----------------|--------------------------|-----------------|
|                            | HK                      | H0              | AK                       | A0              |
| TEWL (g/m <sup>2</sup> /h) |                         |                 |                          |                 |
| Forearm                    | -2.412 (0.016)a         | -0.597 (0.550)a | -2.666 (0.008)a          | -1.274 (0.203)b |
| Leg                        | -1.014 (0.311)a         | -0.784 (0.433)a | -2.666 (0.008)a          | -2.701 (0.007)b |
| Forehead                   | -2.341 (0.019)a         | -0.411 (0.681)a | -2.666 (0.008)a          | -1.580 (0.114)b |
| Hydration (a.u.)           |                         |                 |                          |                 |
| Forearm                    | -0.039 (0.969)b         | -2.380 (0.017)a | -2.675 (0.007)b          | -1.429 (0.153)a |
| Leg                        | -0.774 (0.439)b         | -1.069 (0.285)a | -2.668 (0.008)b          | -0.358 (0.721)b |
| Forehead                   | -1.575 (0.115)b         | -2.524 (0.012)a | -2.670 (0.008)b          | -0.408 (0.683)b |
| Erythema (a*)              |                         |                 |                          |                 |
| Forearm                    | -2.271 (0.023)a         | -2.782 (0.005)a | -2.310 (0.021)a          | -0.561 (0.575)a |
| SCORAD Index               | n.a.                    | n.a.            | -2.666 (0.008)a          | -1.682 (0.092)b |

HK – Healthy skin with kefir intake; H0 - Healthy skin without kefir intake; AK – Atopic skin with kefir intake; A0 – Atopic skin without kefir intake. TEWL – Transepidermal Water Loss. Individuals were compared by Wilcoxon signed rank test, with  $p < 0.05$  for statistical significance. a - based on positive ranks (variable at t0 > variable at t8); b – based on negative ranks (variable at t0 < variable at t8).
